# Supplementary material for: Identification of High Serum Apolipoprotein A1 as a Favorable Prognostic Indicator in Patients with Multiple Myeloma
Source: PubMed Central journal article supplement (PMC6775509; doi:10.7150/jca.31357), 2019-08-27
Supplement: jcav10p4852s1.pdf [file jcav10p4852s1.pdf]

**Table S1. Characteristics of Patients with Multiple Myeloma**

| Variables         | No. of Patients (%)<br>(N= 307) | Variables                              | No. of Patients (%)<br>(N= 307) |
|-------------------|---------------------------------|----------------------------------------|---------------------------------|
| <b>Age, year</b>  |                                 | <b>Albumin, g/dL</b>                   |                                 |
| ≤ 65              | 205 (66.8)                      | <3.5                                   | 185 (60.3)                      |
| >65               | 102 (33.2)                      | ≥3.5                                   | 122 (39.7)                      |
| <b>Gender</b>     |                                 | <b>β2-MG, mg/L</b>                     |                                 |
| Female            | 114 (37.1)                      | <3.5                                   | 95 (30.9)                       |
| Male              | 193 (62.9)                      | ≥3.5                                   | 212 (69.1)                      |
| <b>Isotype</b>    |                                 | <b>FLC ratio*</b>                      |                                 |
| IgG               | 152 (49.5)                      | Normal                                 | 73 (59.3)                       |
| IgA               | 85 (27.7)                       | Abnormal                               | 50 (40.7)                       |
| IgD               | 8 (2.6)                         | <b>Lipid profile, median (mean±SD)</b> |                                 |
| Light chain       | 49 (16.0)                       | Cholesterol, mmol/L                    | 3.37 (3.44±1.26)                |
| Biclonal          | 1 (0.3)                         | Triglyceride, mmol/L                   | 1.20 (1.45±1.18)                |
| Non-Secretory     | 12 (3.9)                        | LDL, mmol/L                            | 1.76 (1.88±0.98)                |
| <b>ISS Stage</b>  |                                 | HDL, mmol/L                            | 0.88 (0.93±0.34)                |
| I                 | 59 (19.2)                       | Apo A1, g/L                            | 1.02 (1.04±0.31)                |
| II                | 101 (32.9)                      | Apo B, g/L                             | 0.64 (0.65±0.28)                |
| III               | 147 (47.9)                      | <b>Cytogenetic Abnormality*</b>        |                                 |
| <b>LDH, U/L</b>   |                                 | Del(17p)                               | 38 (39.6)                       |
| Normal            | 232 (75.6)                      | Del(13q)                               | 53 (55.2)                       |
| High              | 75 (24.4)                       | 1q21 amplification                     | 54 (56.3)                       |
| <b>Hb, g/dL</b>   |                                 | IgH translocation                      | 46 (47.9)                       |
| <10               | 174 (56.7)                      | <b>Initial Treatment</b>               |                                 |
| ≥10               | 133 (43.3)                      | PIs involved                           | 171* (55.7)                     |
| <b>SCr, mg/dL</b> |                                 | IMiDs involved                         | 162* (52.8)                     |
| <2                | 247 (80.5)                      | No new drugs                           | 38 (12.4)                       |
| ≥2                | 60 (19.5)                       | No data                                | 12 (3.9)                        |
| <b>Ca, mg/dL</b>  |                                 |                                        |                                 |
| <10               | 239(77.9)                       |                                        |                                 |
| ≥10               | 68(22.1)                        |                                        |                                 |

Abbreviation: ISS, International Staging System; LDH, lactate dehydrogenase; SCr, serum creatinine; β2MG, β2 microglobulin; FLC, free light chain; SD, standard deviation; LDL, low density lipoprotein; HDL, high density lipoprotein, Apo A1, apolipoprotein A1; Apo B, apolipoprotein B; PI, protease inhibitor; IMiDs, immunomodulatory drugs;

\*Records of FLC were available in 123 patients.

\*fluorescence in situ hybridization (FISH) test results were available in 96 patients.

\*76 patients received both IMiDs and Bortezomib-based treatment were counted twice.

**Table S2. Univariate Cox Regression of Dichotomized Patient Characteristics**

| Variables            | OS                  | <i>P</i>         | PFS                 | <i>P</i>         | CSS                 | <i>P</i>         |
|----------------------|---------------------|------------------|---------------------|------------------|---------------------|------------------|
|                      | HR (95%CI)          |                  | HR (95%CI)          |                  | HR (95%CI)          |                  |
| <b>Age</b>           |                     | 0.119            |                     | 0.305            |                     | 0.147            |
| ≤ 65                 | Reference           |                  | Reference           |                  | Reference           |                  |
| >65                  | 1.384 (0.922-2.077) |                  | 1.207 (0.844-1.726) |                  | 1.376 (0.896-2.113) |                  |
| <b>Gender</b>        |                     | 0.419            |                     | 0.577            |                     | 0.628            |
| Male                 | Reference           |                  | Reference           |                  | Reference           |                  |
| Female               | 0.839 (0.550-1.282) |                  | 0.903 (0.631-1.291) |                  | 0.896 (0.576-1.394) |                  |
| <b>Isotype*</b>      |                     |                  |                     |                  |                     |                  |
| IgG                  | Reference           |                  | Reference           |                  | Reference           |                  |
| IgA                  | 1.667 (1.051-2.646) | <b>0.031</b>     | 1.425 (0.968-2.099) | 0.074            | 1.453 (0.893-2.363) | 0.134            |
| IgD                  | 1.565 (0.560-4.375) | 0.395            | 0.833 (0.303-2.285) | 0.724            | 1.576 (0.563-4.412) | 0.389            |
| Light chain          | 1.996 (1.163-3.425) | <b>0.013</b>     | 1.403 (0.861-2.284) | 0.176            | 1.653 (0.921-2.968) | 0.094            |
| No secretory         | 1.305 (0.403-4.228) | 0.659            | 0.653 (0.206-2.075) | 0.472            | 1.360 (0.419-4.414) | 0.611            |
| <b>Apo A1, g/L</b>   |                     | <b>&lt;0.001</b> |                     | <b>0.002</b>     |                     | <b>&lt;0.001</b> |
| ≤0.9                 | Reference           |                  | Reference           |                  | Reference           |                  |
| >0.9                 | 0.506 (0.342-0.749) |                  | 0.578 (0.411-0.814) |                  | 0.469 (0.310-0.708) |                  |
| <b>Albumin, g/dL</b> |                     | 0.884            |                     | 0.180            |                     | 0.571            |
| <3.5                 | Reference           |                  | Reference           |                  | Reference           |                  |
| ≥3.5                 | 0.970 (0.650-1.449) |                  | 0.785 (0.552-1.117) |                  | 0.883 (0.576-1.354) |                  |
| <b>β2MG, mg/L</b>    |                     | <b>&lt;0.001</b> |                     | <b>&lt;0.001</b> |                     | <b>&lt;0.001</b> |
| <3.5                 | Reference           |                  | Reference           |                  | Reference           |                  |
| ≥3.5                 | 2.522 (1.563-4.069) |                  | 2.034 (1.383-2.989) |                  | 2.360 (1.441-3.869) |                  |
| <b>LDH</b>           |                     | <b>&lt;0.001</b> |                     | <b>&lt;0.001</b> |                     | <b>&lt;0.001</b> |
| Normal               | Reference           |                  | Reference           |                  | Reference           |                  |
| High                 | 2.979 (1.931-4.595) |                  | 2.210 (1.500-3.256) |                  | 3.136 (1.987-4.948) |                  |
| <b>Hb, g/dL</b>      |                     | <b>0.002</b>     |                     | <b>0.015</b>     |                     | <b>0.001</b>     |
| <10                  | Reference           |                  | Reference           |                  | Reference           |                  |
| ≥10                  | 0.522 (0.344-0.793) |                  | 0.649 (0.459-0.919) |                  | 0.479 (0.307-0.747) |                  |
| <b>SCr, mg/dL</b>    |                     | <b>0.037</b>     |                     | 0.083            |                     | <b>0.033</b>     |
| <2                   | Reference           |                  | Reference           |                  | Reference           |                  |
| ≥2                   | 1.661 (1.035-2.665) |                  | 1.463 (0.954-2.243) |                  | 1.720 (1.046-2.827) |                  |
| <b>Ca, mg/dL</b>     |                     | 0.110            |                     | 0.178            |                     | 0.149            |
| <10                  | Reference           |                  | Reference           |                  | Reference           |                  |
| ≥10                  | 1.438 (0.923-2.240) |                  | 1.312 (0.885-1.945) |                  | 1.415 (0.885-2.263) |                  |

Abbreviation: ISS, International Staging System; Apo A1, apolipoprotein A1; LDH, lactate dehydrogenase; β2MG, β2 microglobulin; SCr, serum creatinine.

**Table S3. Evaluation of the Three Prognostic Model**

|     |     | AUC                 | AIC    | BIC    | C-index |
|-----|-----|---------------------|--------|--------|---------|
| OS  | DS  | 0.633 (0.533-0.734) | 946.5  | 950.2  | 0.514   |
|     | ISS | 0.710 (0.603-0.819) | 938.8  | 942.5  | 0.593   |
|     | ZS  | 0.852 (0.788-0.917) | 912.5  | 916.2  | 0.669   |
| PFS | DS  | 0.613 (0.497-0.846) | 1277.8 | 1281.5 | 0.528   |
|     | ISS | 0.742 (0.638-0.846) | 1269.8 | 1273.6 | 0.591   |
|     | ZS  | 0.742 (0.654-0.830) | 1253.3 | 1257   | 0.644   |
| CSS | DS  | 0.634 (0.534-0.734) | 843.4  | 847.1  | 0.513   |
|     | ISS | 0.701 (0.590-0.813) | 839    | 842.7  | 0.58    |
|     | ZS  | 0.853 (0.786-0.919) | 813.5  | 817.2  | 0.672   |

Abbreviation: DS, Durie and Salmon system; ISS, International Staging System; ZS, Zhongshan Score;

### Supplemental document 1

The International Myeloma Working Group (IMWG) consensus criteria for response and minimal residual disease assessment in multiple myeloma, progressive disease is defined as following:

Any one or more of the following:

- ♦ Increase of 25% from lowest confirmed response value in one or more of the following criteria:
  - ✓ Serum M-protein (absolute increase must be  $\geq 0.5$  g/dL);
  - ✓ Serum M-protein increase  $\geq 1$  g/dL, if the lowest M component was  $\geq 5$  g/dL;
  - ✓ Urine M-protein (absolute increase must be  $\geq 200$  mg/24 hours);
  - ✓ In patients without measurable serum and urine M-protein levels, the difference between involved and uninvolved FLC levels (absolute increase must be  $>10$  mg/dL);
  - ✓ In patients without measurable serum and urine M-protein levels and without measurable involved FLC levels, bone marrow plasma-cell percentage irrespective of baseline status (absolute increase must be  $\geq 10\%$ );
- ♦ Appearance of a new lesion(s),  $\geq 50\%$  increase from nadir in SPD\*\* of  $>1$  lesion, or  $\geq 50\%$  increase in the longest diameter of a previous lesion  $>1$  cm in short axis;
- ♦  $\geq 50\%$  increase in circulating plasma cells (minimum of 200 cells per microL) if this is the only measure of disease.
